# Supplementary material for: Lactate activates hypothalamic POMC neurons by intercellular signaling
Source: PubMed Central journal article supplement (PMC8569171; doi:10.1038/s41598-021-00947-7), 2021-11-04
Supplement: 41598_2021_947_MOESM1_ESM.pdf [file 41598_2021_947_MOESM1_ESM.pdf]

## **Lactate activates hypothalamic POMC neurons by intercellular signaling**

Órdenes P<sup>1</sup>, Villar PS<sup>2</sup>, Tarifeño-Saldivia E<sup>3</sup>, Salgado M<sup>1</sup>, Elizondo-Vega R<sup>1</sup>, Araneda RC<sup>2\*</sup>,  
García-Robles MA<sup>1\*</sup>

<sup>1</sup>Laboratorio de Biología Celular, Departamento de Biología Celular, Facultad de Ciencias Biológicas, Universidad de Concepción

<sup>2</sup>Department of Biology, University of Maryland, College Park, Maryland 20742

<sup>3</sup>Gene Expression and Regulation Laboratory, Departamento de Bioquímica y Biología Molecular, Facultad de Ciencias Biológicas, Universidad de Concepción.

Corresponding authors: María A. García-Robles, PhD, Laboratorio de Biología Celular, Departamento de Biología Celular Facultad de Ciencias Biológicas Universidad de Concepción Concepción, Chile

Email: [mgarcia@udec.cl](mailto:mgarcia@udec.cl) and

Ricardo C. Araneda, PhD, Department of Biology, Bioscience Research Bldg. R-1114

University of Maryland College Park, MD 20742 USA

[raraneda@umd.edu](mailto:raraneda@umd.edu)

## **Supplementary Methods**

### **Immunoblotting**

Total protein extracts were obtained from murine cerebellum, hippocampus, cortex and basal hypothalamus samples homogenized with the following solution: 0.3 mM sucrose, 3 mM DTT, 1 mM EDTA, 2 mg/mL pepstatin A, 100 mg/mL PMSF, 2 mg/mL leupeptin, and 2 mg/mL aprotinin. The basal hypothalamus was dissected from fresh brains over an ice-cold surface by making two transverse cuts, one at the optic chiasm and another just before the mammillary bodies, dissecting the area closest to the 3V<sup>50</sup>. Subsequently, the samples were sonicated on ice at 300 W (Sonics & Material INC., VCF1, Newtown, CT, US), three times, for 10 s. After centrifugation at 8000 g for 10 min, proteins were resolved by SDS PAGE (50 mg/lane), in a 10% (w/v) polyacrylamide gel, and transferred to PVDF membranes (0.45 mm pore, Amersham Pharmacia Biotech., Piscataway, NJ), and probed with rabbit anti-HCA1 (1:1000, Sigma-Aldrich Cat# SAB1300089, RRID:AB\_10603645) and anti- $\beta$  actin (1:10000, Santa Cruz Biotechnology Cat# sc-47778 HRP, RRID:AB\_2714189) antibodies. After extensive washing of the primary antibodies, the PVDF membranes were incubated for 2 h., at 4 °C, with peroxidase-labeled anti-rabbit or anti-mouse IgG (1:5000; Jackson ImmunoResearch Labs Cat# 711-035-152, RRID:AB\_10015282). The reaction was developed using the Western Lightening Plus-ECL kit (Perkin Elmer; Cat# NEL103001EA) and imaged with a luminescent chemo and fluorescence imaging equipment (PXi, Syngene).

## Figures

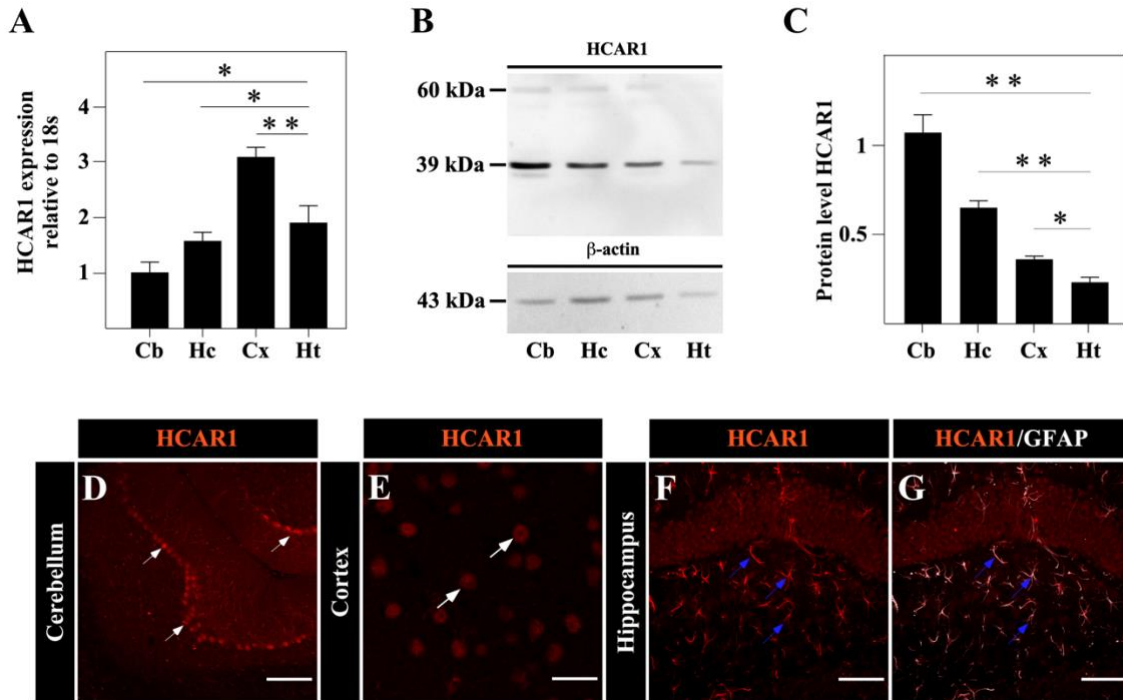

**Supplementary Figure S1. Brain HCARI expression and localization** (A) The HCARI sequence was amplified by qRT PCR using specific primers to HCARI and 18S as a housekeeping control gene. Data was normalized to the number of copies found in the cerebellum. Amplified PCR products for the cerebellum, hippocampus, cortex, and hypothalamus. (B-C) HCARI western blot in total protein extract of cerebellum, hippocampus, cortex, and hypothalamus and quantification relative to  $\beta$ -actin. \*  $p < 0.05$ , \*\* $p < 0.01$ . (D-G) Immunolocalization of HCARI (red) and GFAP (white). HCARI was detected in Purkinje neurons (D, arrows), cortical neurons (E, arrows) in hippocampal astrocytes (F-G, blue arrows). Scale bar (D, F, G); 100  $\mu$ m, E; 30  $\mu$ m.

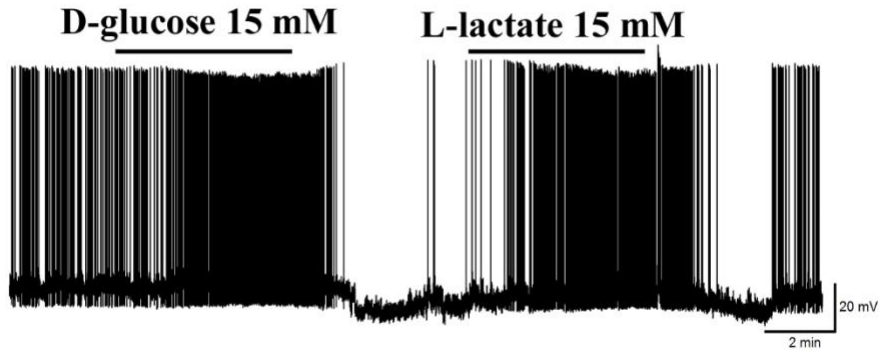

**Supplementary Figure S2. Glucose and lactate excite POMC neurons in POMC-EGFP mice model.** Current clamp recording in a representative POMC-EGFP neuron. This neuron is excited by D-glucose (15 mM) and L-lactate (15 mM). During the basal and recovery conditions the slice was perfused with aCSF containing 1mM glucose. The resting membrane potential of this neuron was  $-55$  mV.

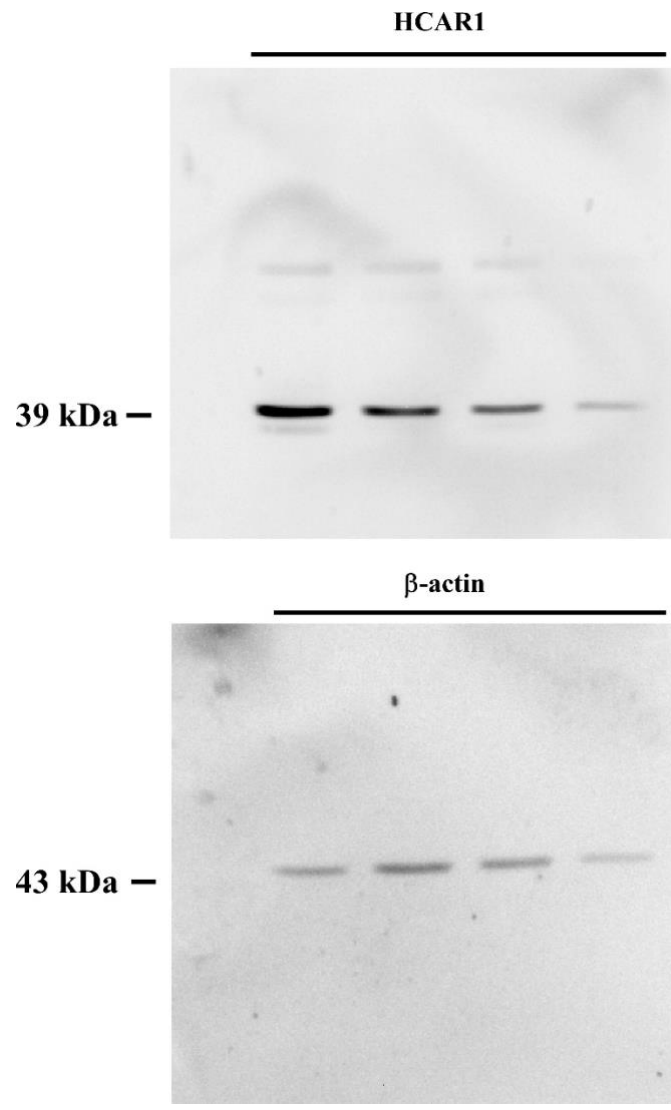

**Figure supplementary S3. Uncropped version of the western blots presented in the Supplementary Figure S1.**

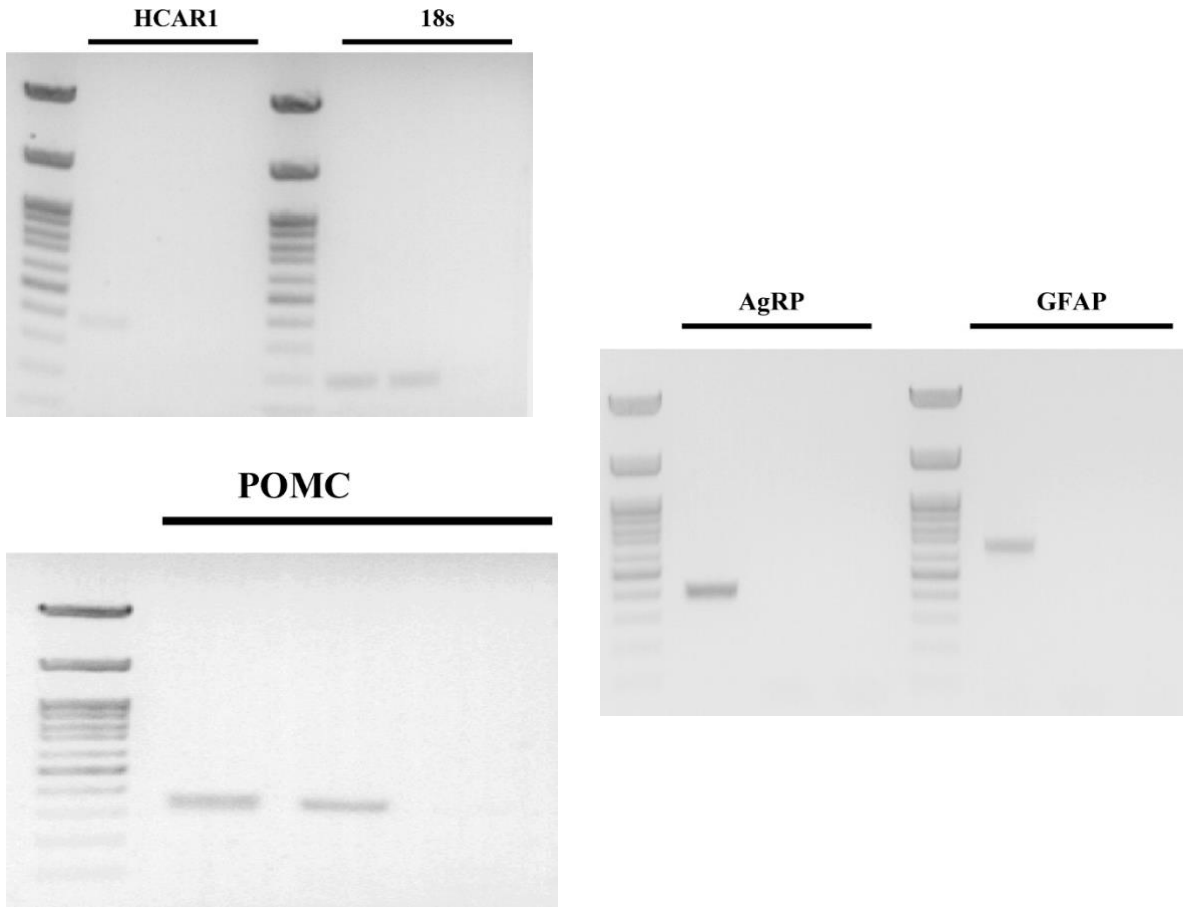

**Supplementary Figure S4. Uncropped version of the PCR presented in the figure 5D.**
